# Supplementary material
Source: Springer Nature journal article supplement (https://www.springermedizin.de/resource/supplementary/12885_2008_1200_MOESM1_ESM.pdf/9471410)

(a)

(b)

(c)

blood

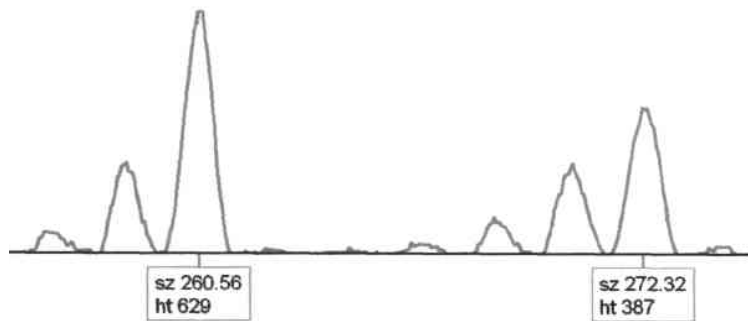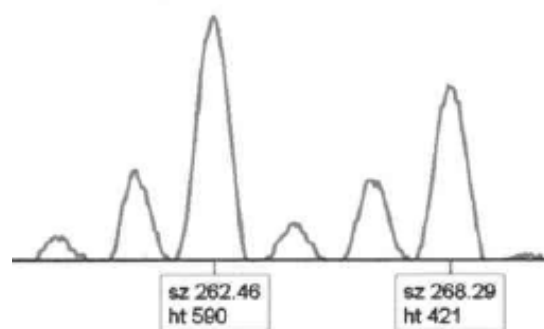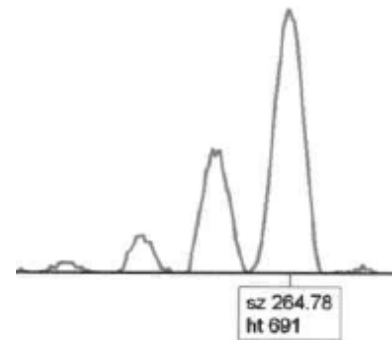

tumor

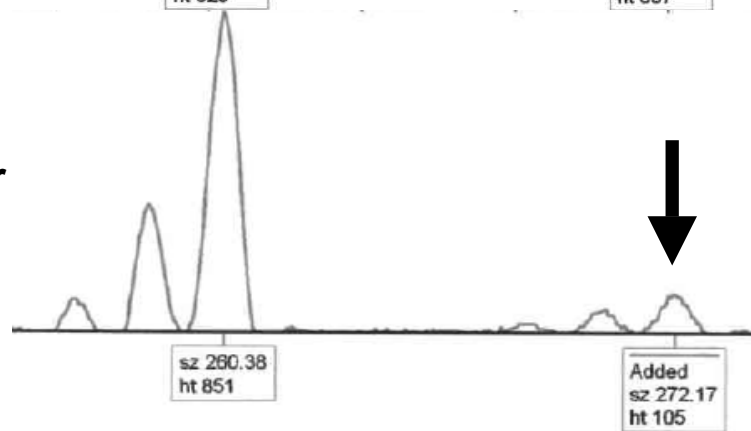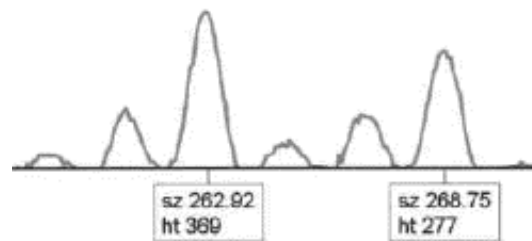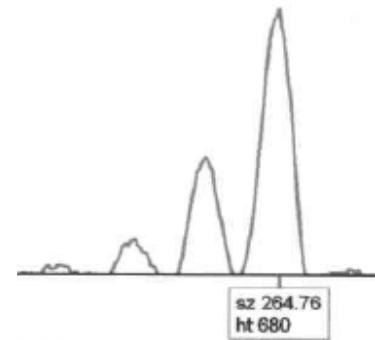

Supplement: MOESM1 [file 9471410]
